# Supplementary material for: Retinoid X receptor agonist LG100268 modulates the immune microenvironment in preclinical breast cancer models
Source: NPJ Breast Cancer. 2019 Nov 1;5:39. doi: 10.1038/s41523-019-0135-5 (PMC6825145; doi:10.1038/s41523-019-0135-5)
Supplement: Supplementary file 1 — Supplementary Information [file 41523_2019_135_MOESM1_ESM.pdf]

## **Supplementary Information**

### **Retinoid X receptor agonist LG100268 modulates the immune microenvironment in preclinical breast cancer models**

Ana S. Leal<sup>1</sup>, Kayla Zydeck<sup>1</sup>, Sarah Carapellucci<sup>1</sup>, Lyndsey A. Reich<sup>1</sup>, Di Zhang<sup>1</sup>, Jessica A. Moerland<sup>1</sup>, Michael B. Sporn<sup>2</sup>, Karen T. Liby<sup>1\*</sup>

#### **Affiliations:**

<sup>1</sup>Michigan State University, Department of Pharmacology & Toxicology, East Lansing, MI

<sup>2</sup>Dartmouth/Geisel School of Medicine at Dartmouth, Department of Molecular and Systems Biology, Hanover, NH

\*To whom correspondence should be addressed: Karen T. Liby, Michigan State University, Department of Pharmacology & Toxicology, B430 Life Science Building, 1355 Bogue Street, East Lansing, MI 48824. Phone: 517-884-8955; Fax: 517-353-8915; Email: [liby.kare@msu.edu](mailto:liby.kare@msu.edu)

**Table of contents:**

|                         |
|-------------------------|
| Supplementary Figure 1  |
| Supplementary Figure 2  |
| Supplementary Figure 3  |
| Supplementary Figure 4  |
| Supplementary Figure 5  |
| Supplementary Figure 6  |
| Supplementary Figure 7  |
| Supplementary Figure 8  |
| Supplementary Figure 9  |
| Supplementary Figure 10 |
| Supplementary Figure 11 |
| Supplementary Figure 12 |
| Supplementary Figure 13 |
| Supplementary Figure 14 |
| Supplementary Figure 15 |
| Supplementary Figure 16 |
| Supplementary Figure 17 |
| Supplementary Figure 18 |

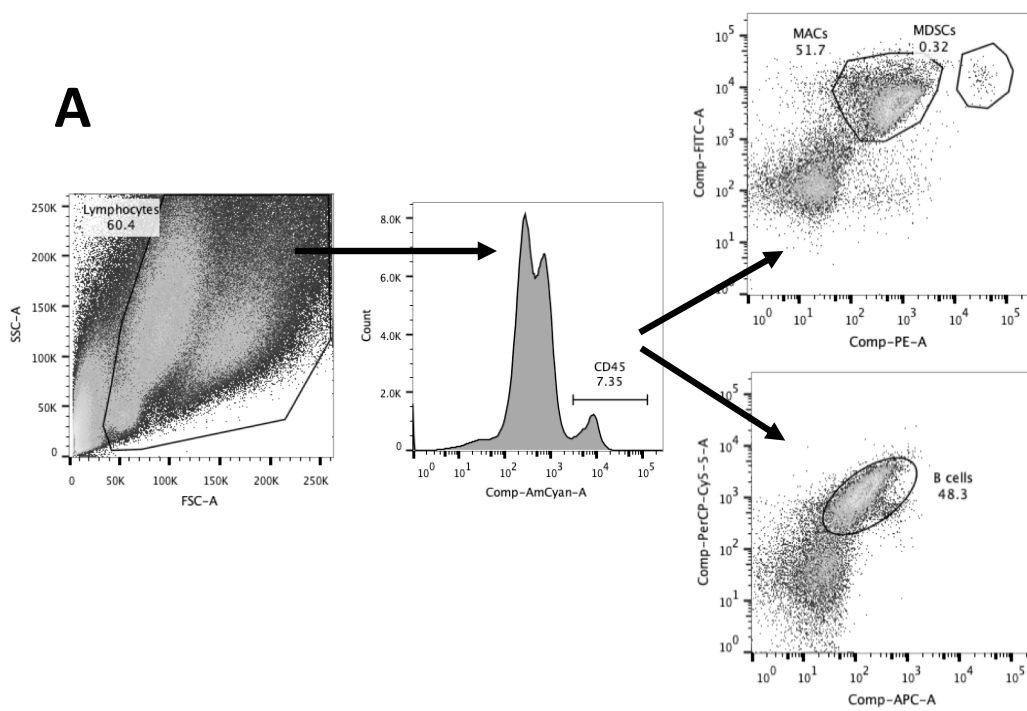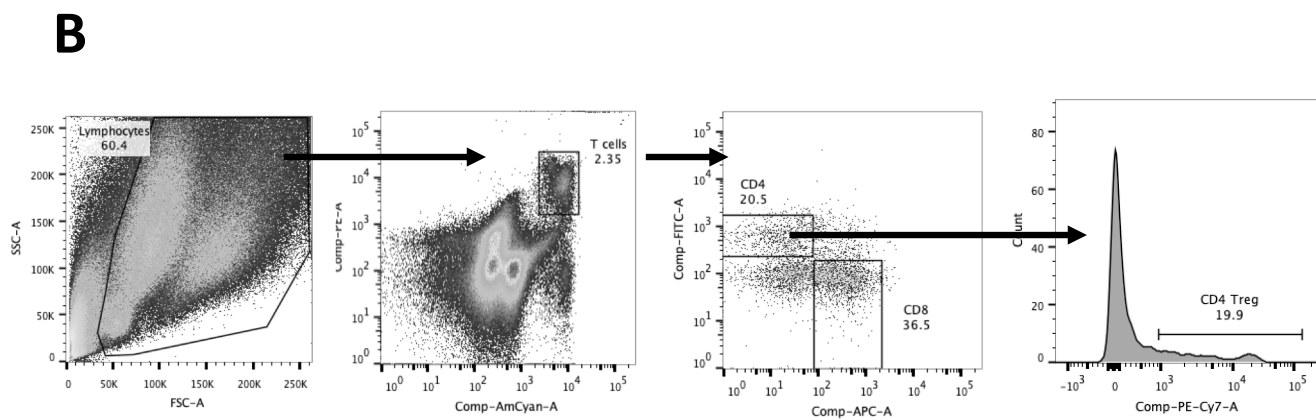

**Supplementary Figure 1. Gating strategy used for flow cytometry analysis of myeloid and T cell populations. MACs= Tumor associated macrophages; MDSCs = Myeloid derived suppressor cells.**

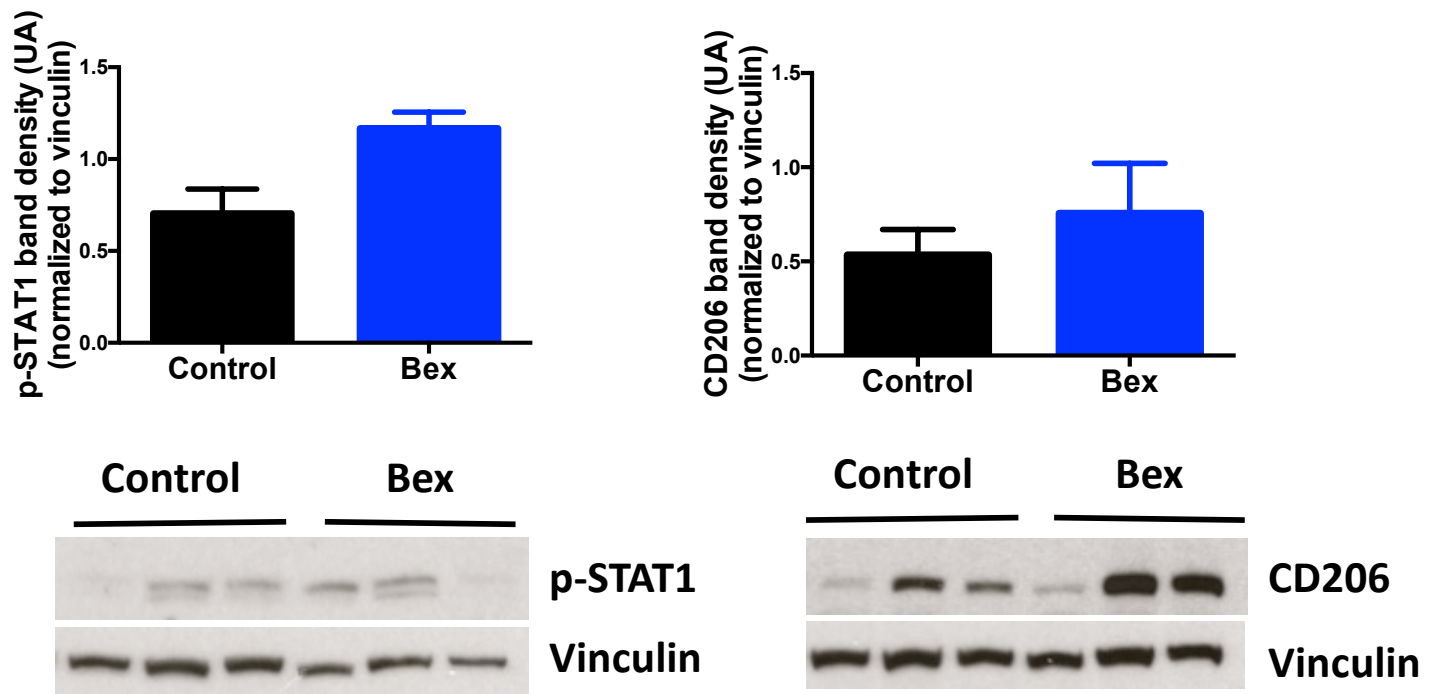

**Supplementary Figure 2. Levels of p-STAT1 and CD206 in tumors of MMTV-Neu mice treated with Bexarotene (100 mg/kg diet) for 10 days.** Levels of p-STAT1 and CD206 were evaluated in tumor lysates (n=3-4 mice/group). Quantification of the whole lysates is shown in the bar graphs, and a representative immunoblot is also shown. Bars represent average and error bars the standard error of the mean (SEM).

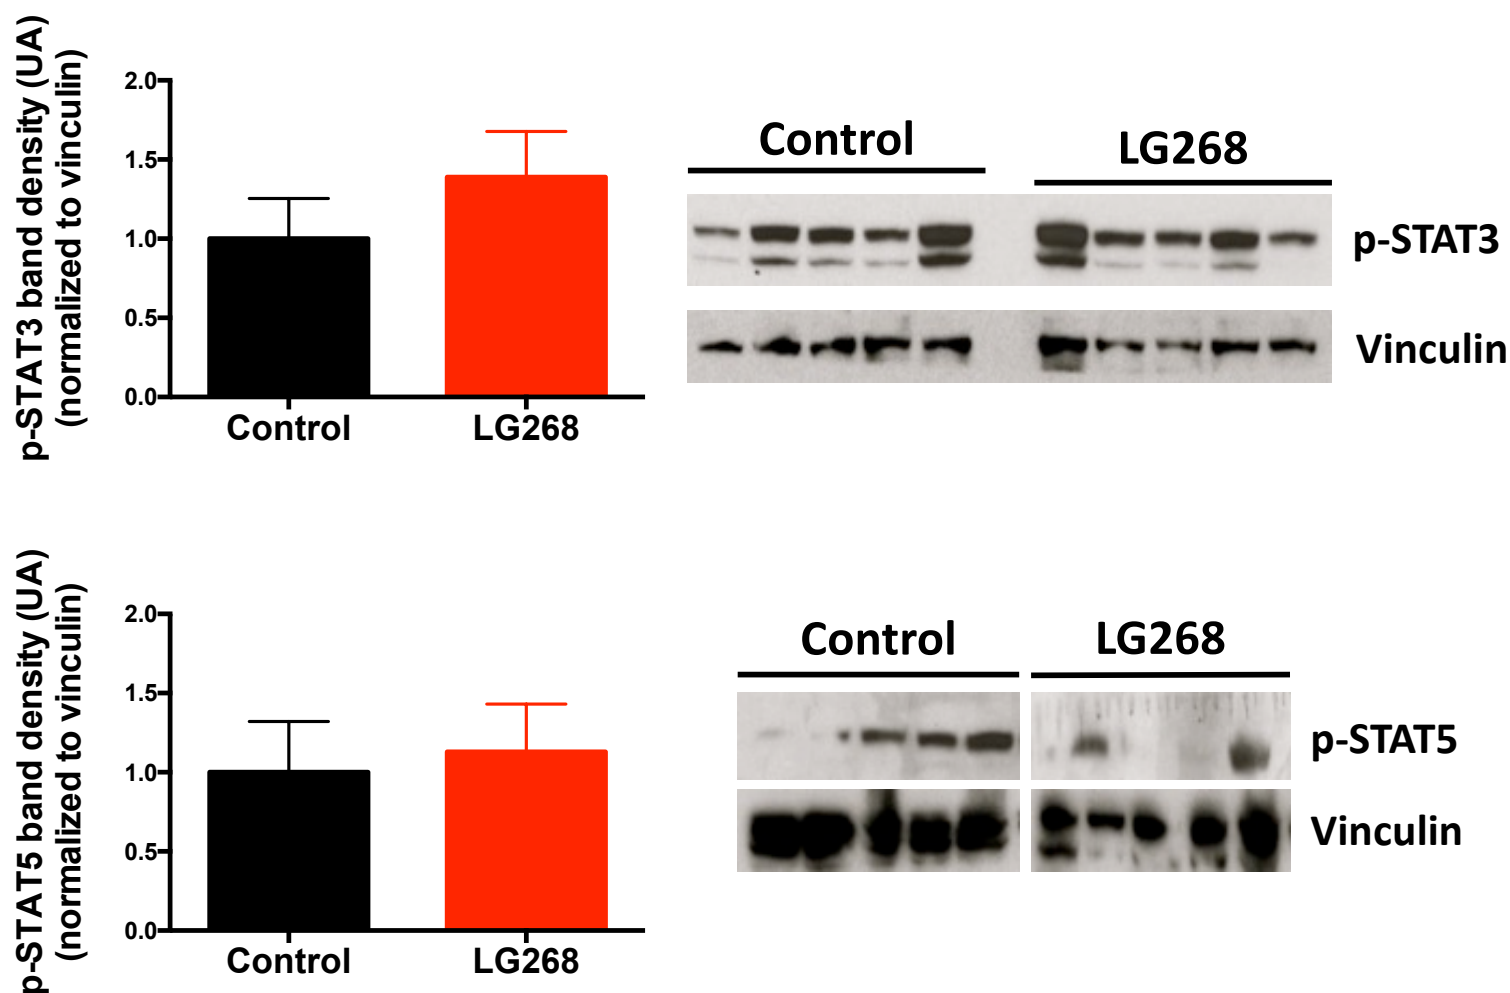

**Supplementary Figure 3.** Levels of p-STAT3 and p-STAT5 in tumor extracts of MMTV-Neu treated as shown in Figure 1 were analyzed by western blotting. Quantification of total protein levels in all samples is shown in the bar graph, and western blots of representative samples are shown. n=11, Bars represent average and error bars the standard error of the mean (SEM).

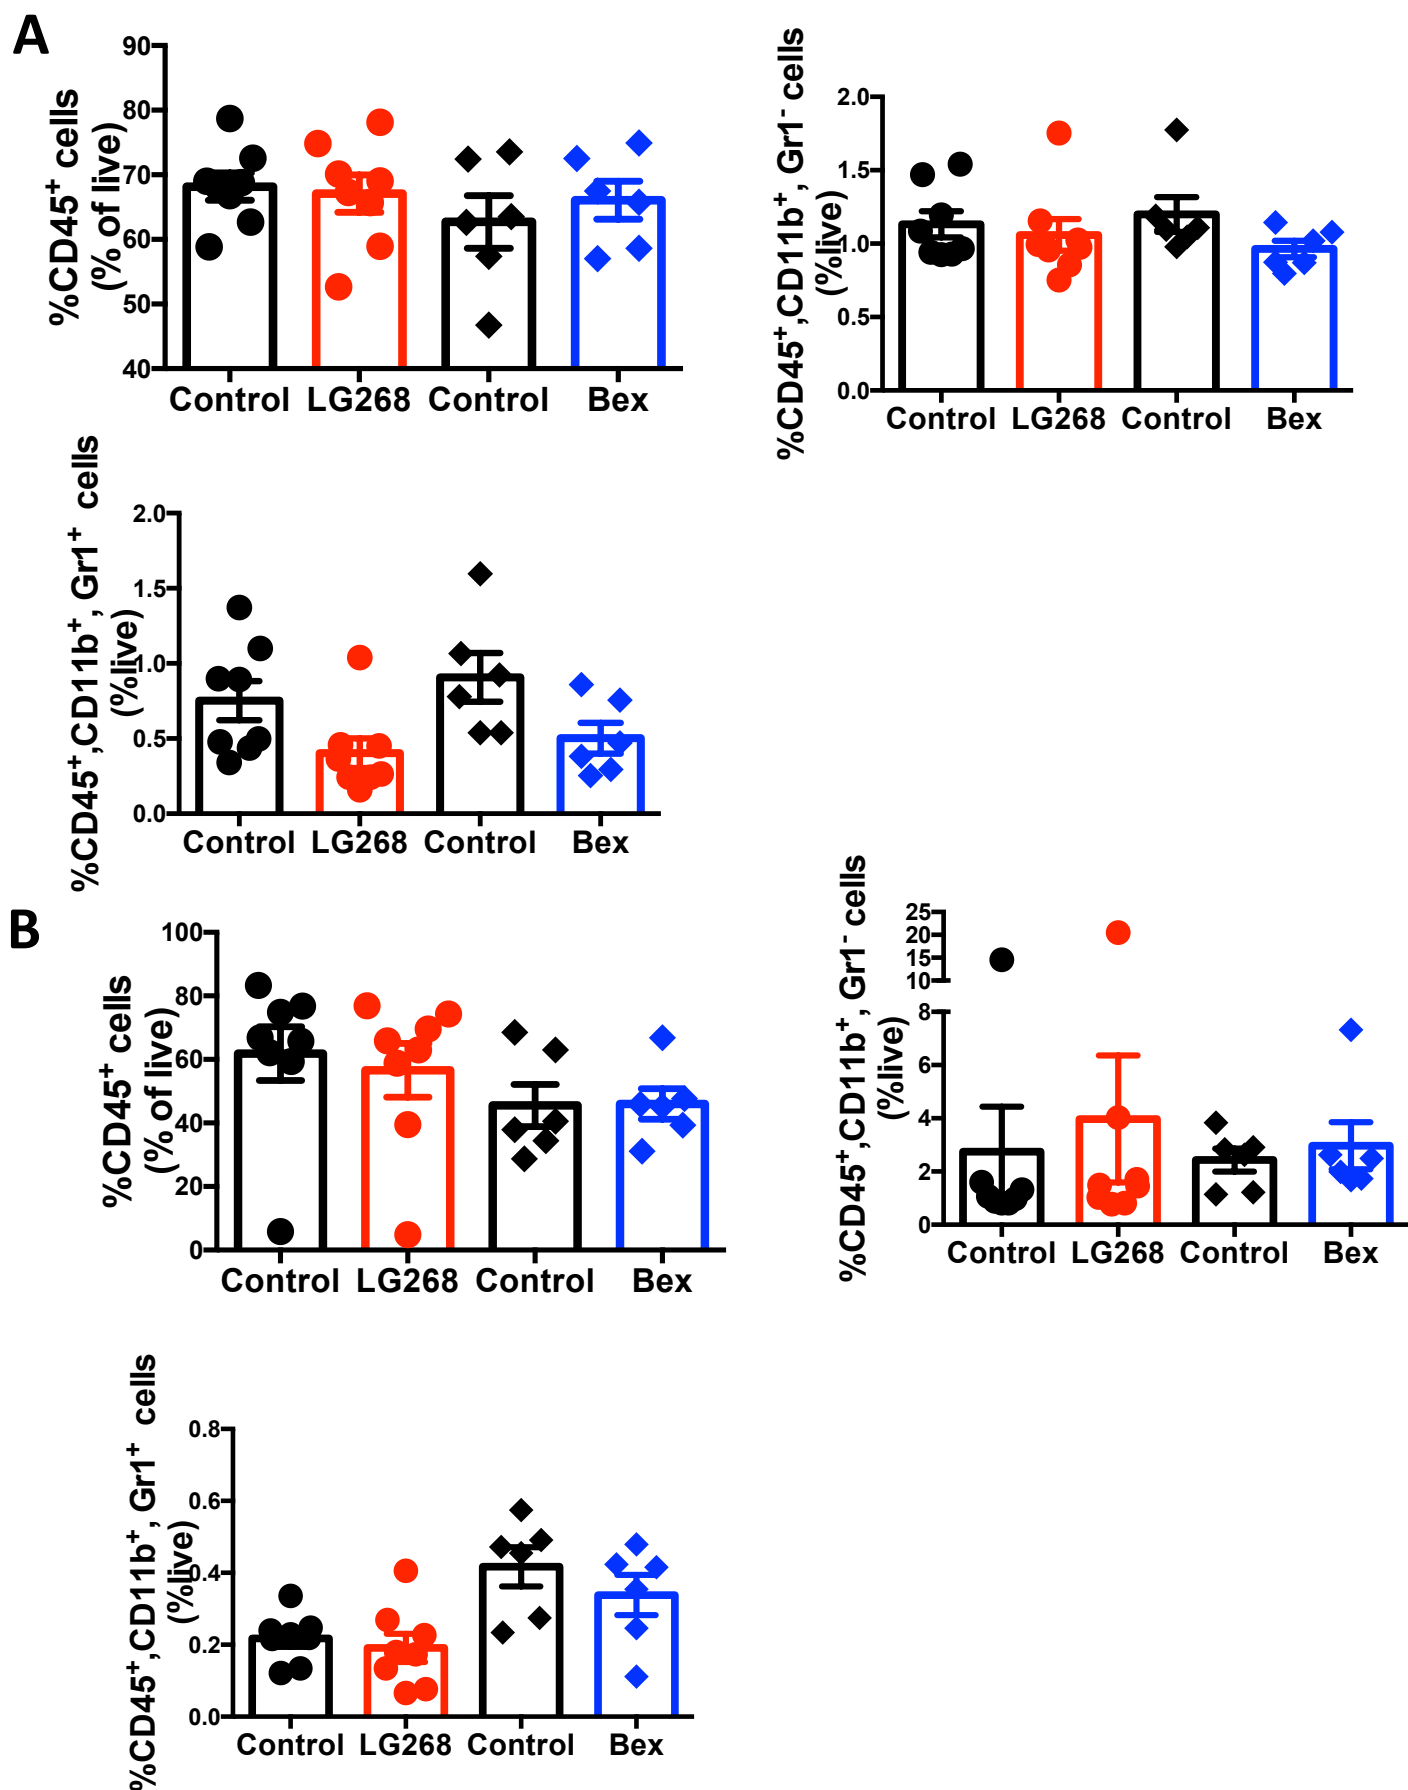

**Supplementary Figure 4. Myeloid cell populations** in the spleen (A) and in intact mammary gland (B) of MMTV-Neu mice treated as described in figure 1 were analyzed by flow cytometry. n=5-8, Bars represent average and error bars the standard error of the mean (SEM).

**Control**

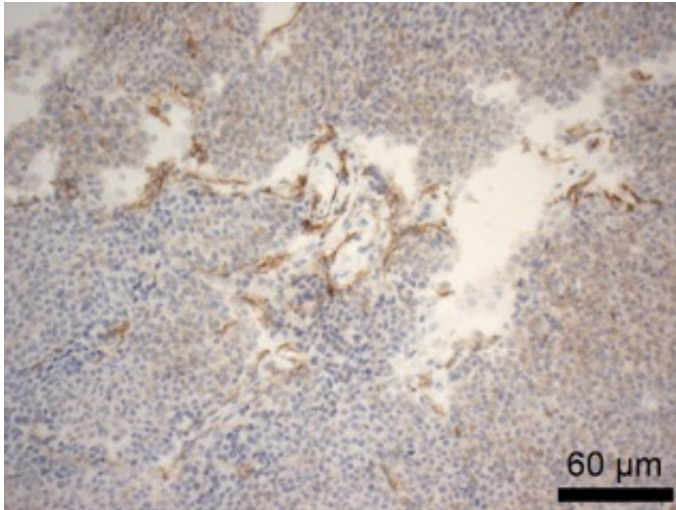

**LG268**

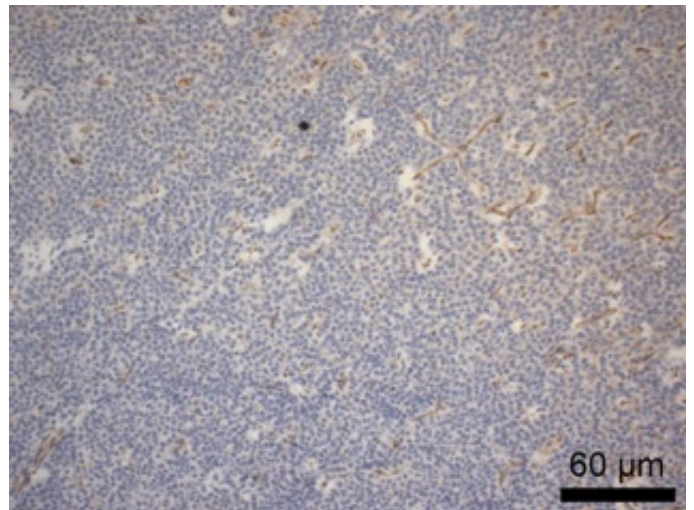

**Supplementary Figure 5. LG268 treatment alters CD31 protein expression in endothelial cells.** Expression of CD31 is altered in established tumors of MMTV-Neu mice treated with LG268 for 5 days, as shown by IHC. Vessels are smaller with a disorganized structure.

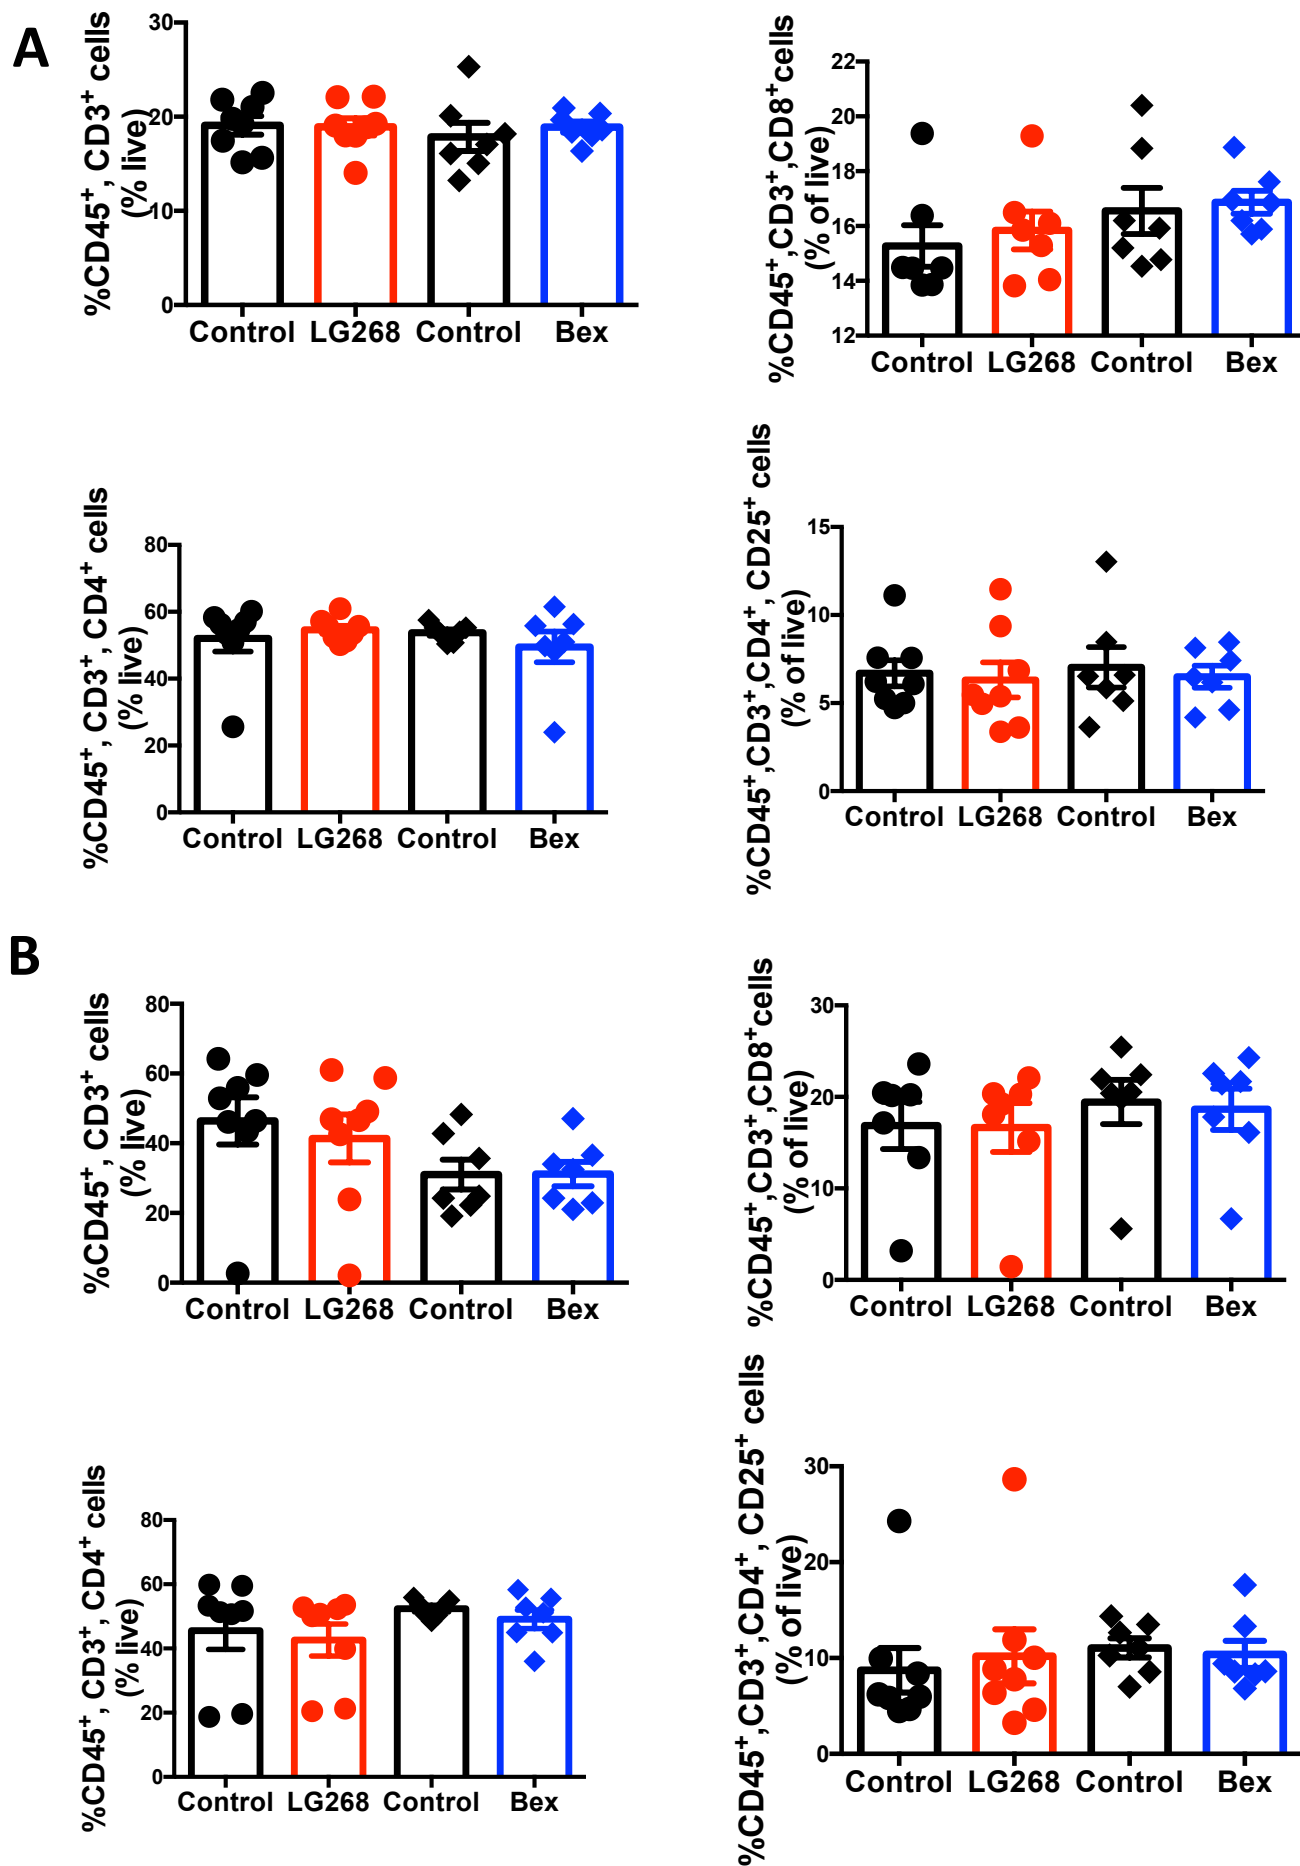

**Supplementary Figure 6. T cell populations in the spleens (A) and in intact mammary glands (B) of MMTV-Neu mice treated as described in figure 1. n=5-8, Bars represent average and error bars the standard error of the mean (SEM).**

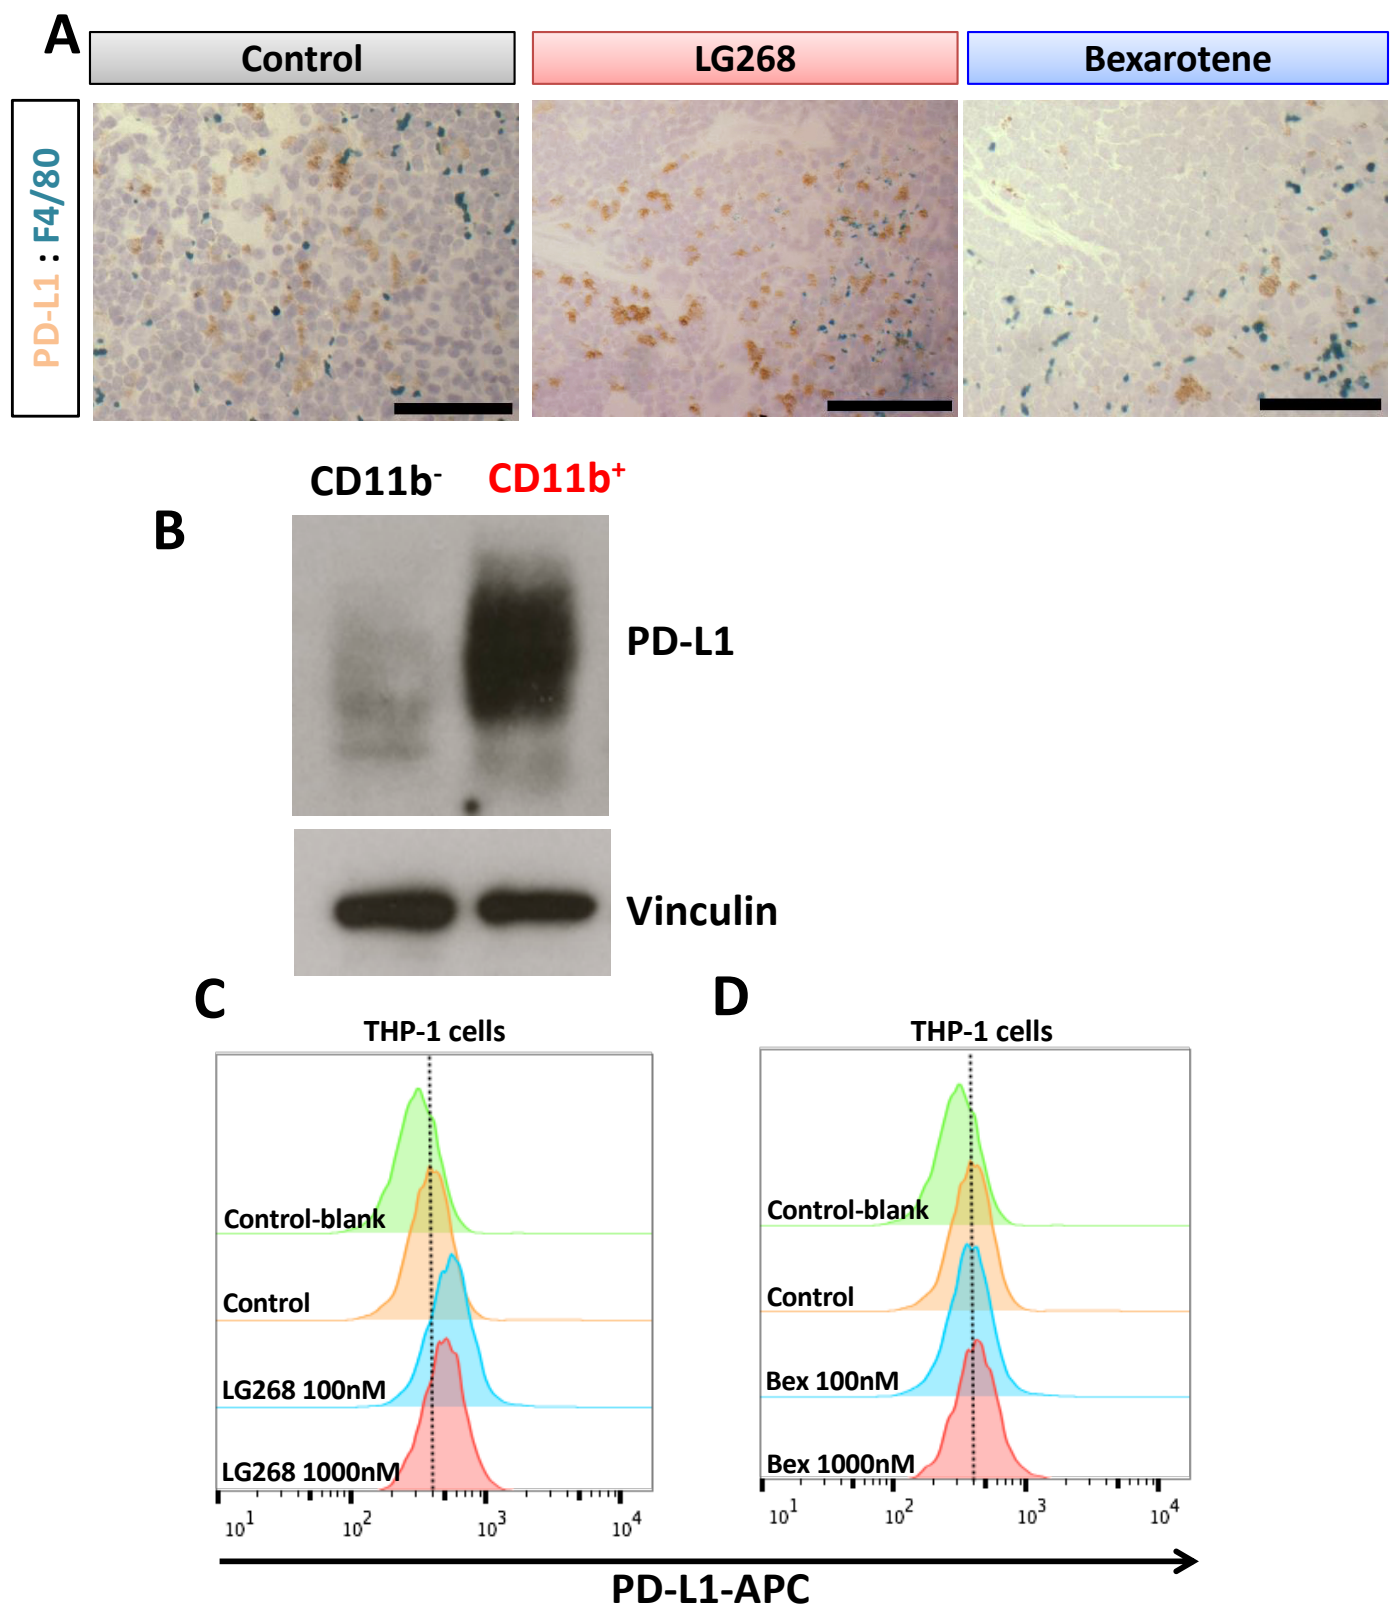

**Supplementary Figure 7. Expression of PD-L1 in macrophages and THP-1 cells. (A)** Dual Immunohistochemistry for PD-L1 (Brown), and F4/80 (green) in spleen of MMTV-Neu mice treated with LG268 or bexarotene. Scale bar represents 60  $\mu$ m. **(B)** CD11b cells were isolated from a tumor of a MMTV-Neu mouse using positive magnetic beads. Levels of PD-L1 were determined by immunoblotting. THP-1 human macrophages stimulated with conditioned media from human SK-BR-3 breast cancer cells and treated with LG268 **(C)** or bexarotene **(D)** were analyzed by flow cytometry to determine levels of PD-L1.

**A**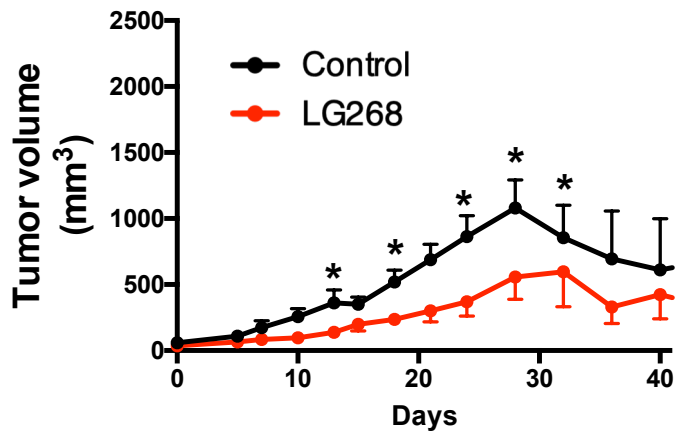**B**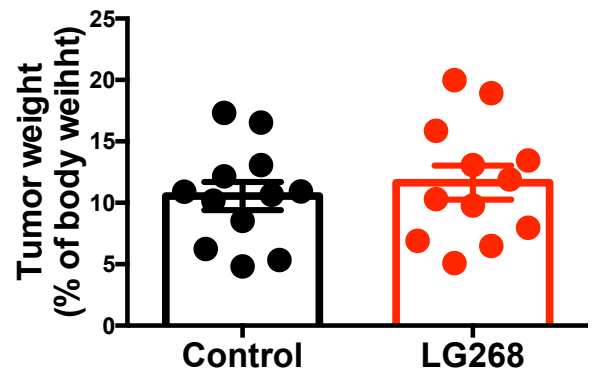

**Supplementary Figure 8. LG268 reduces tumor burden in PyMT mice.** PyMT mice with mammary tumor(s) with an initial volume of 32-64 mm<sup>3</sup> were treated with control diet or LG268 (100 mg/kg diet). **(A)** Combined tumor volume of all mice treated with control diet or LG268 (100 mg/kg diet) for up to 40 days. **(B)** Tumor weights from the end of the study (n=12 mice/group). \* p < 0.05 vs control. Bars represent average and error bars the standard error of the mean (SEM).

**A**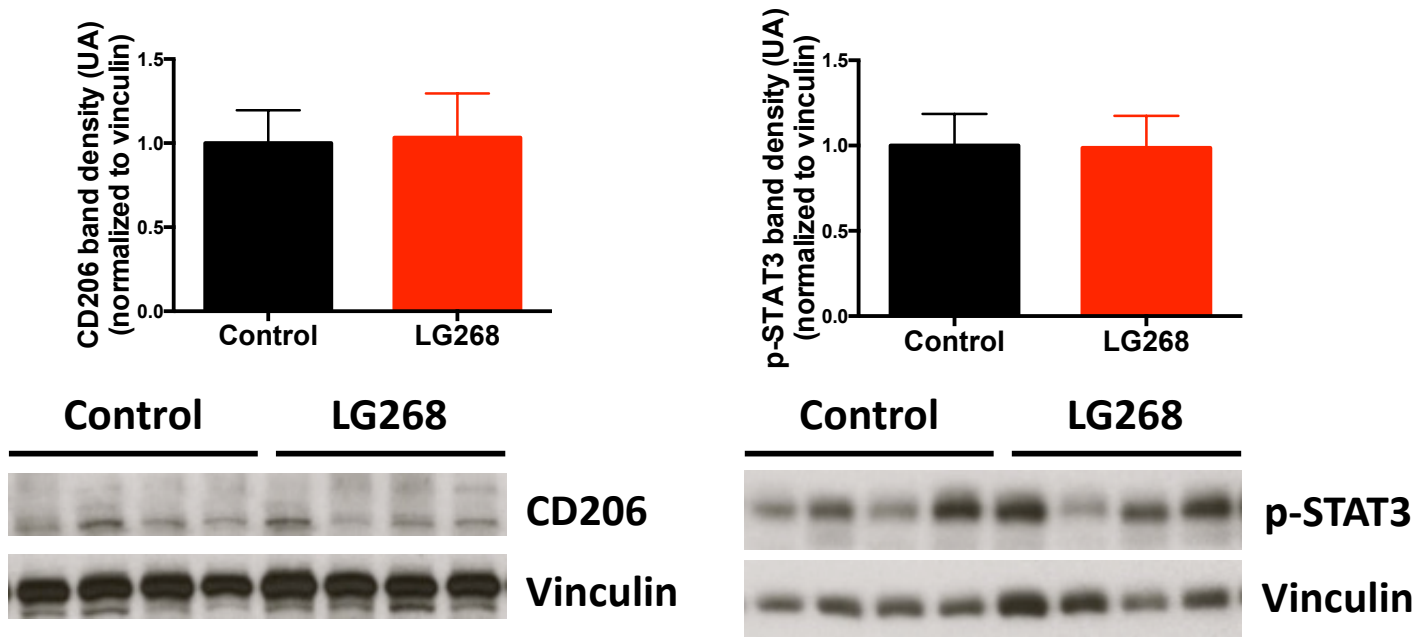**B**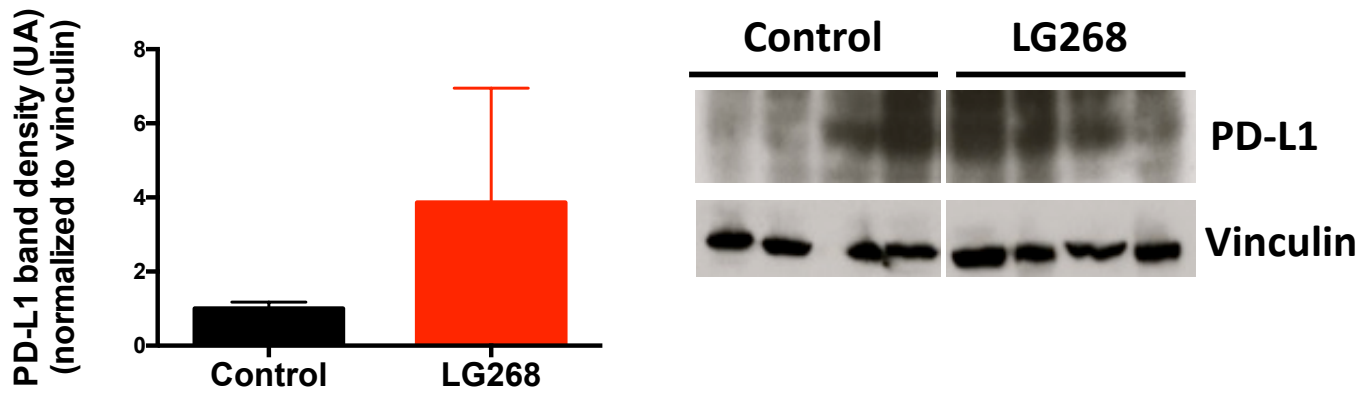

**Supplementary Figure 9.** Levels of protein in tumor extracts at the end point (A) or for 14 days (B) for PyMT mice treated with control diet or LG268 (100 mg/kg diet). Protein levels were determined by western blot; 4 mice per cohort are shown. n=7-12, Bars represent average and error bars the standard error of the mean (SEM).

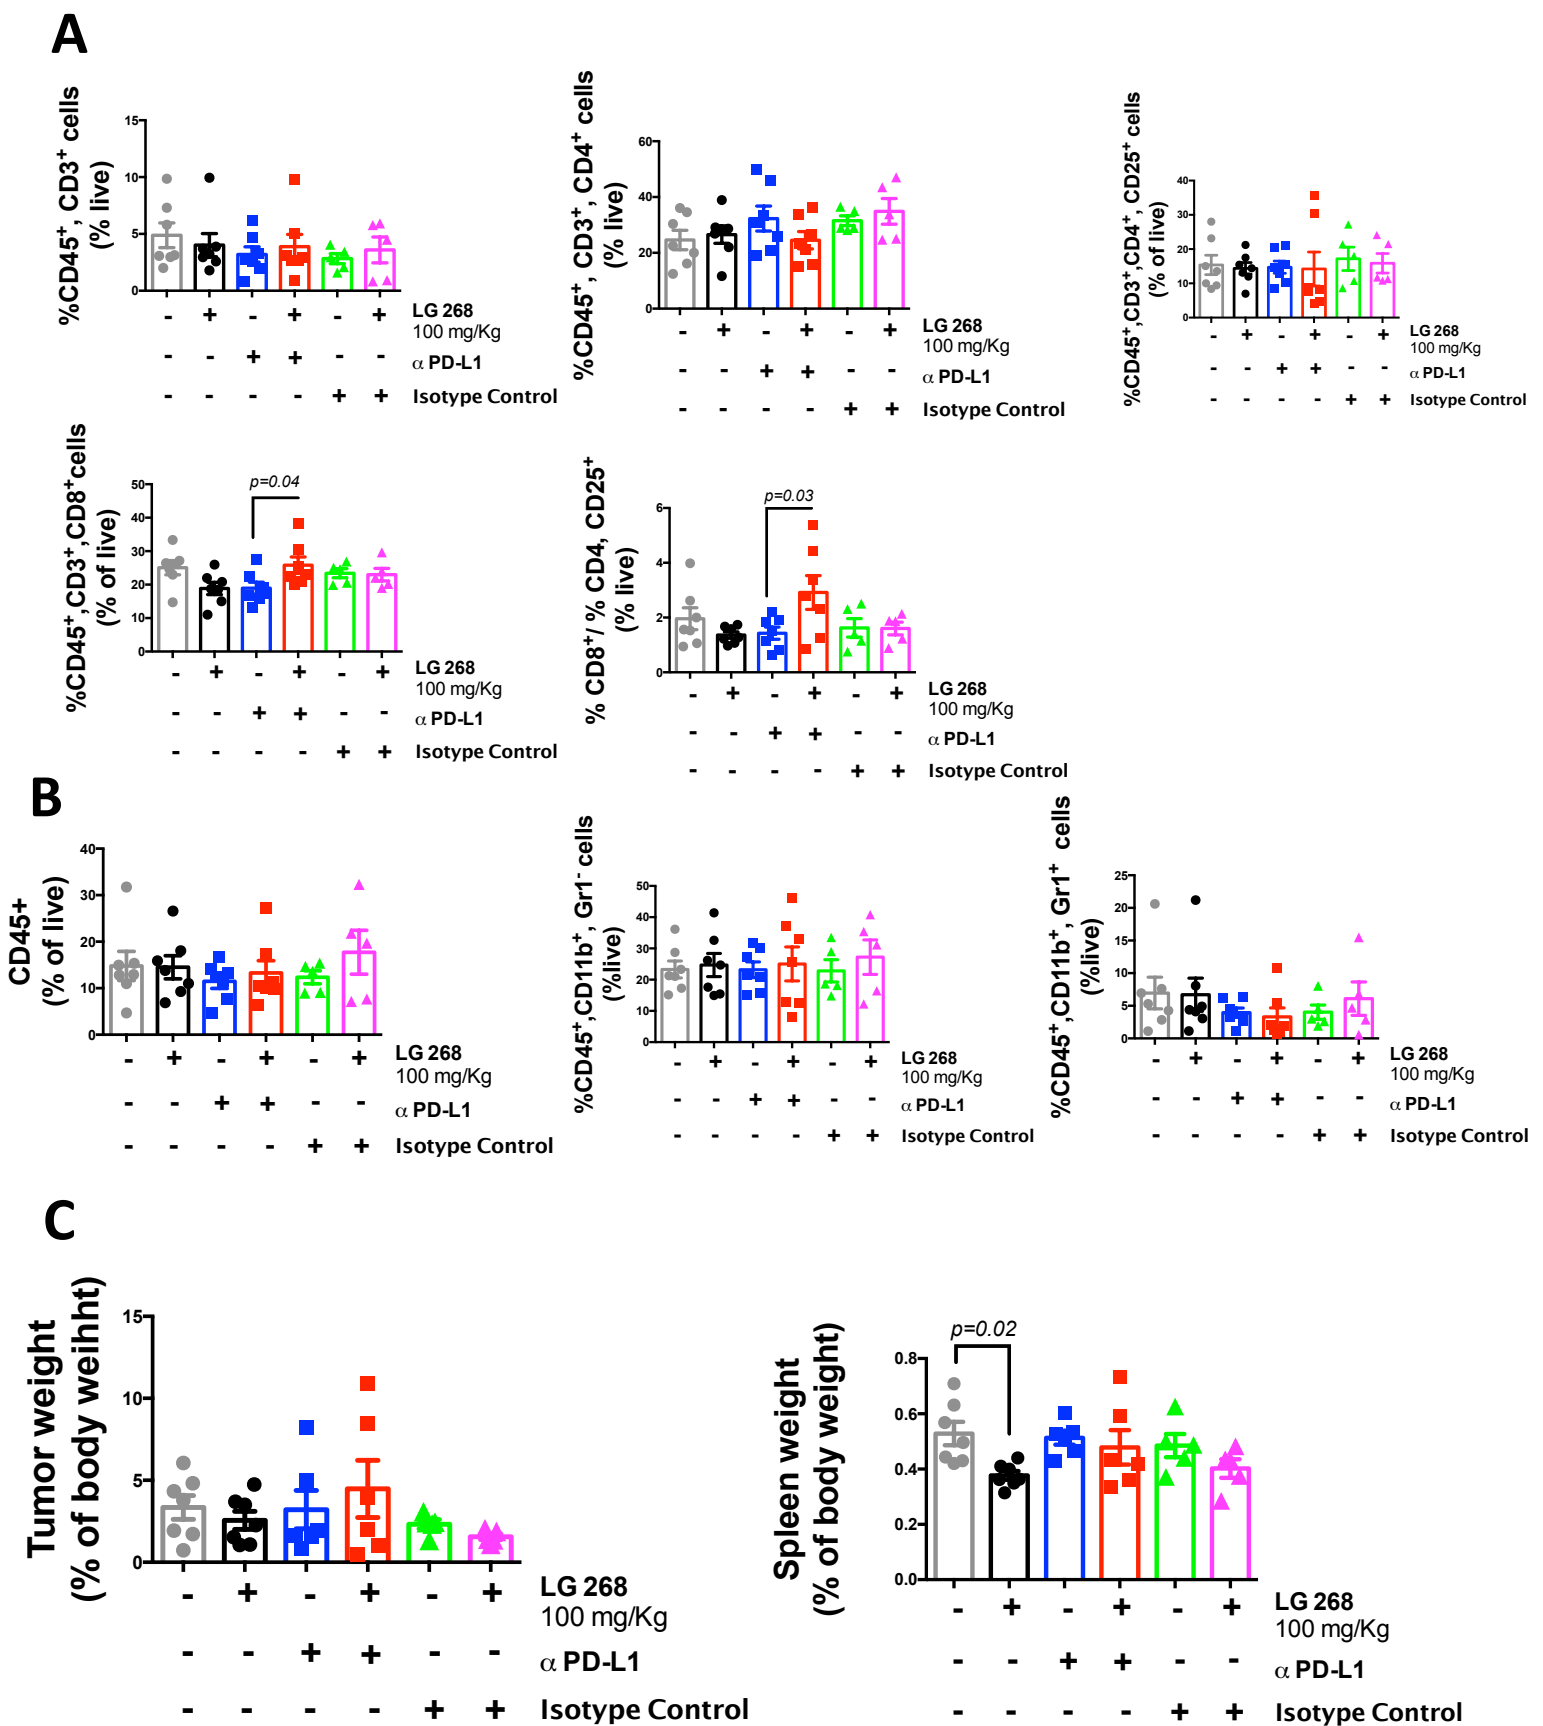

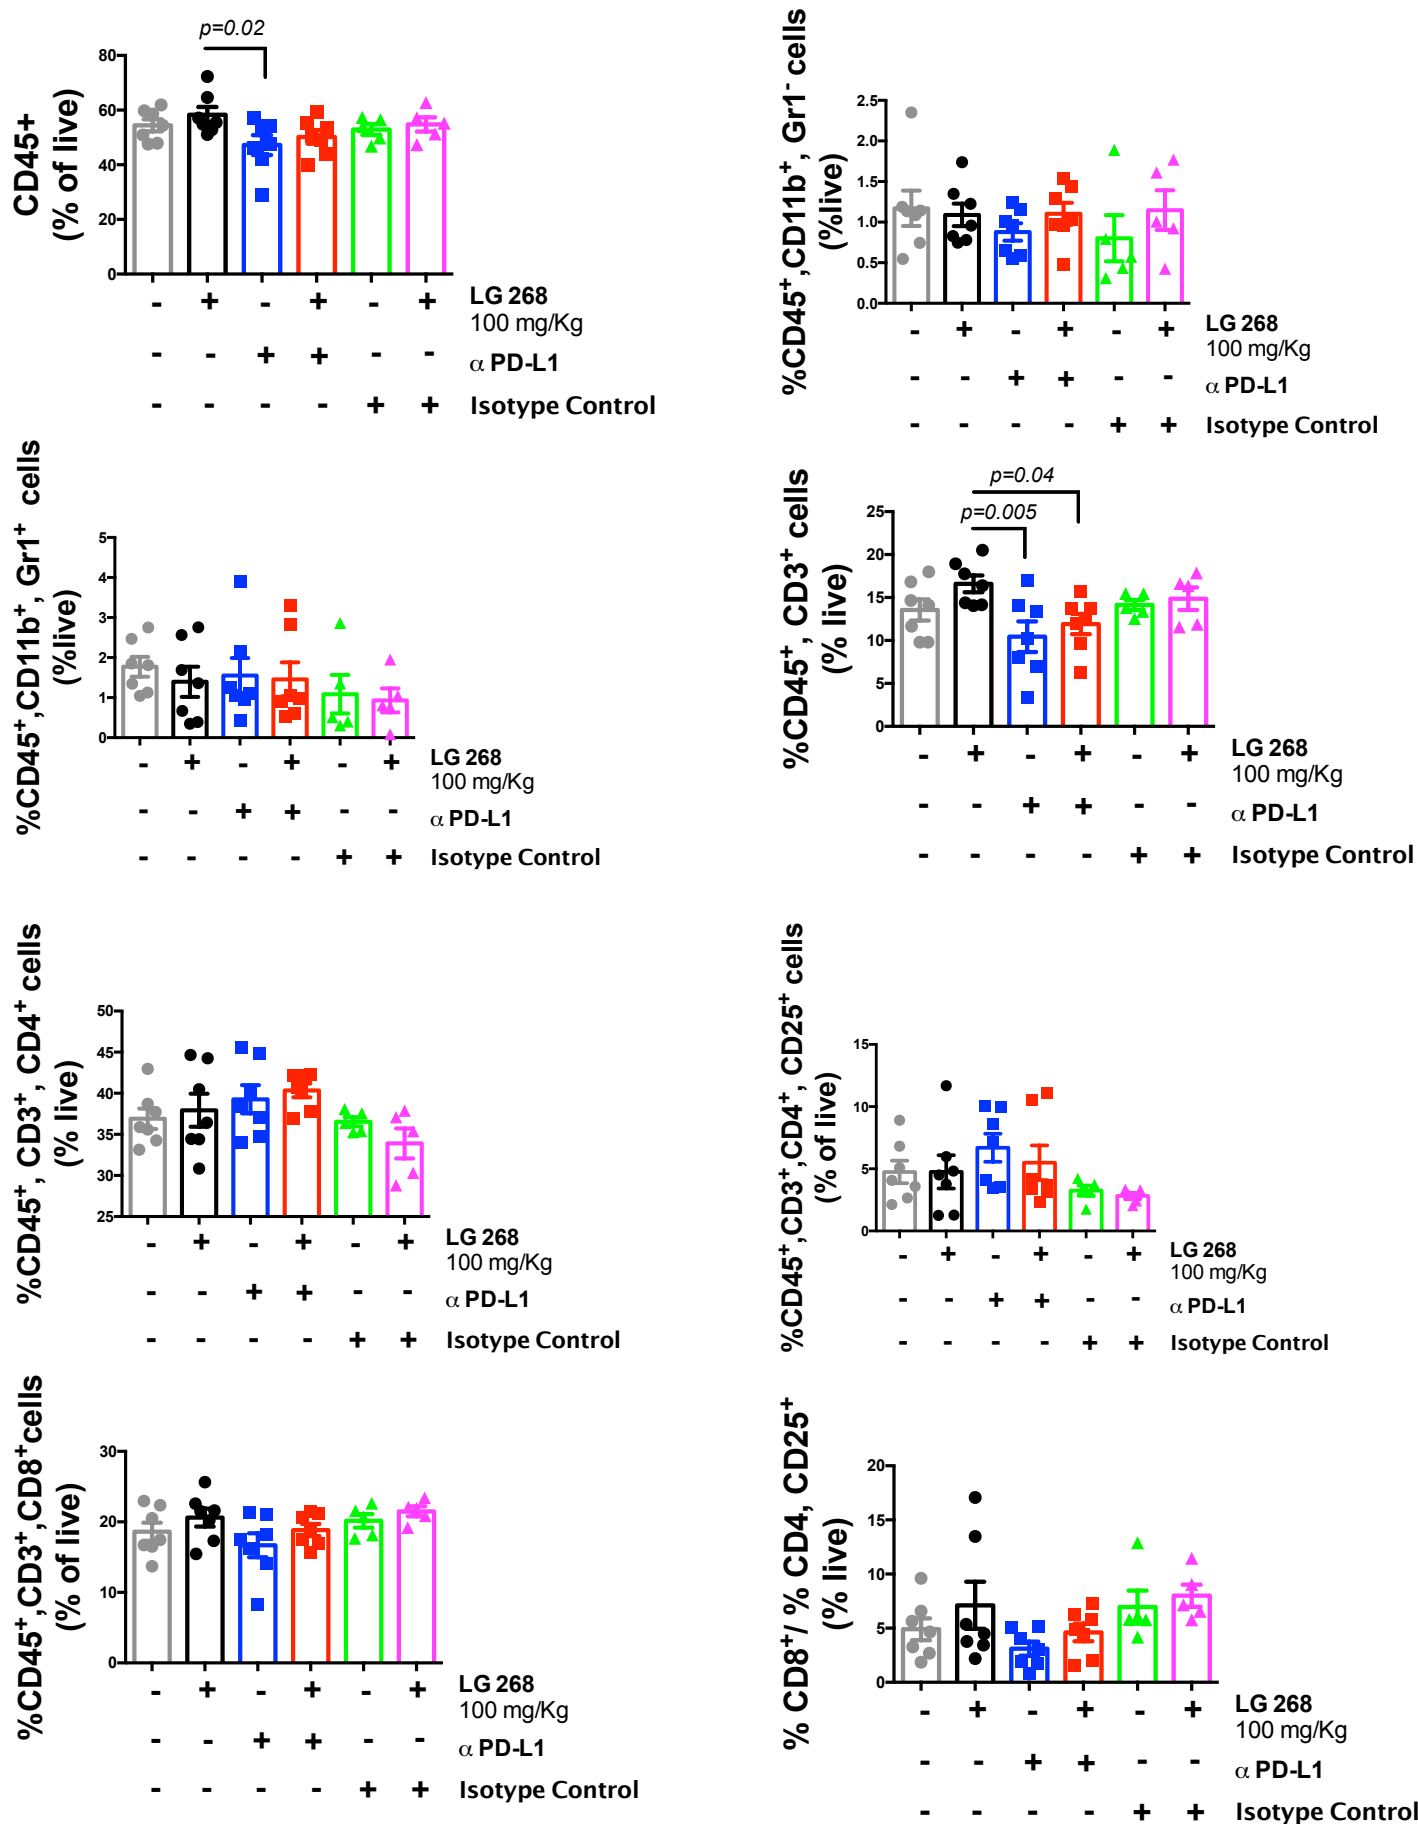

**Supplementary Figure 11.** Cell populations in the spleen of PyMT mice treated for 15 days were analyzed by flow cytometry. Treatment followed the regimen shown in figure 9.  $n=5-7$ , Bars represent average and error bars the standard error of the mean (SEM).

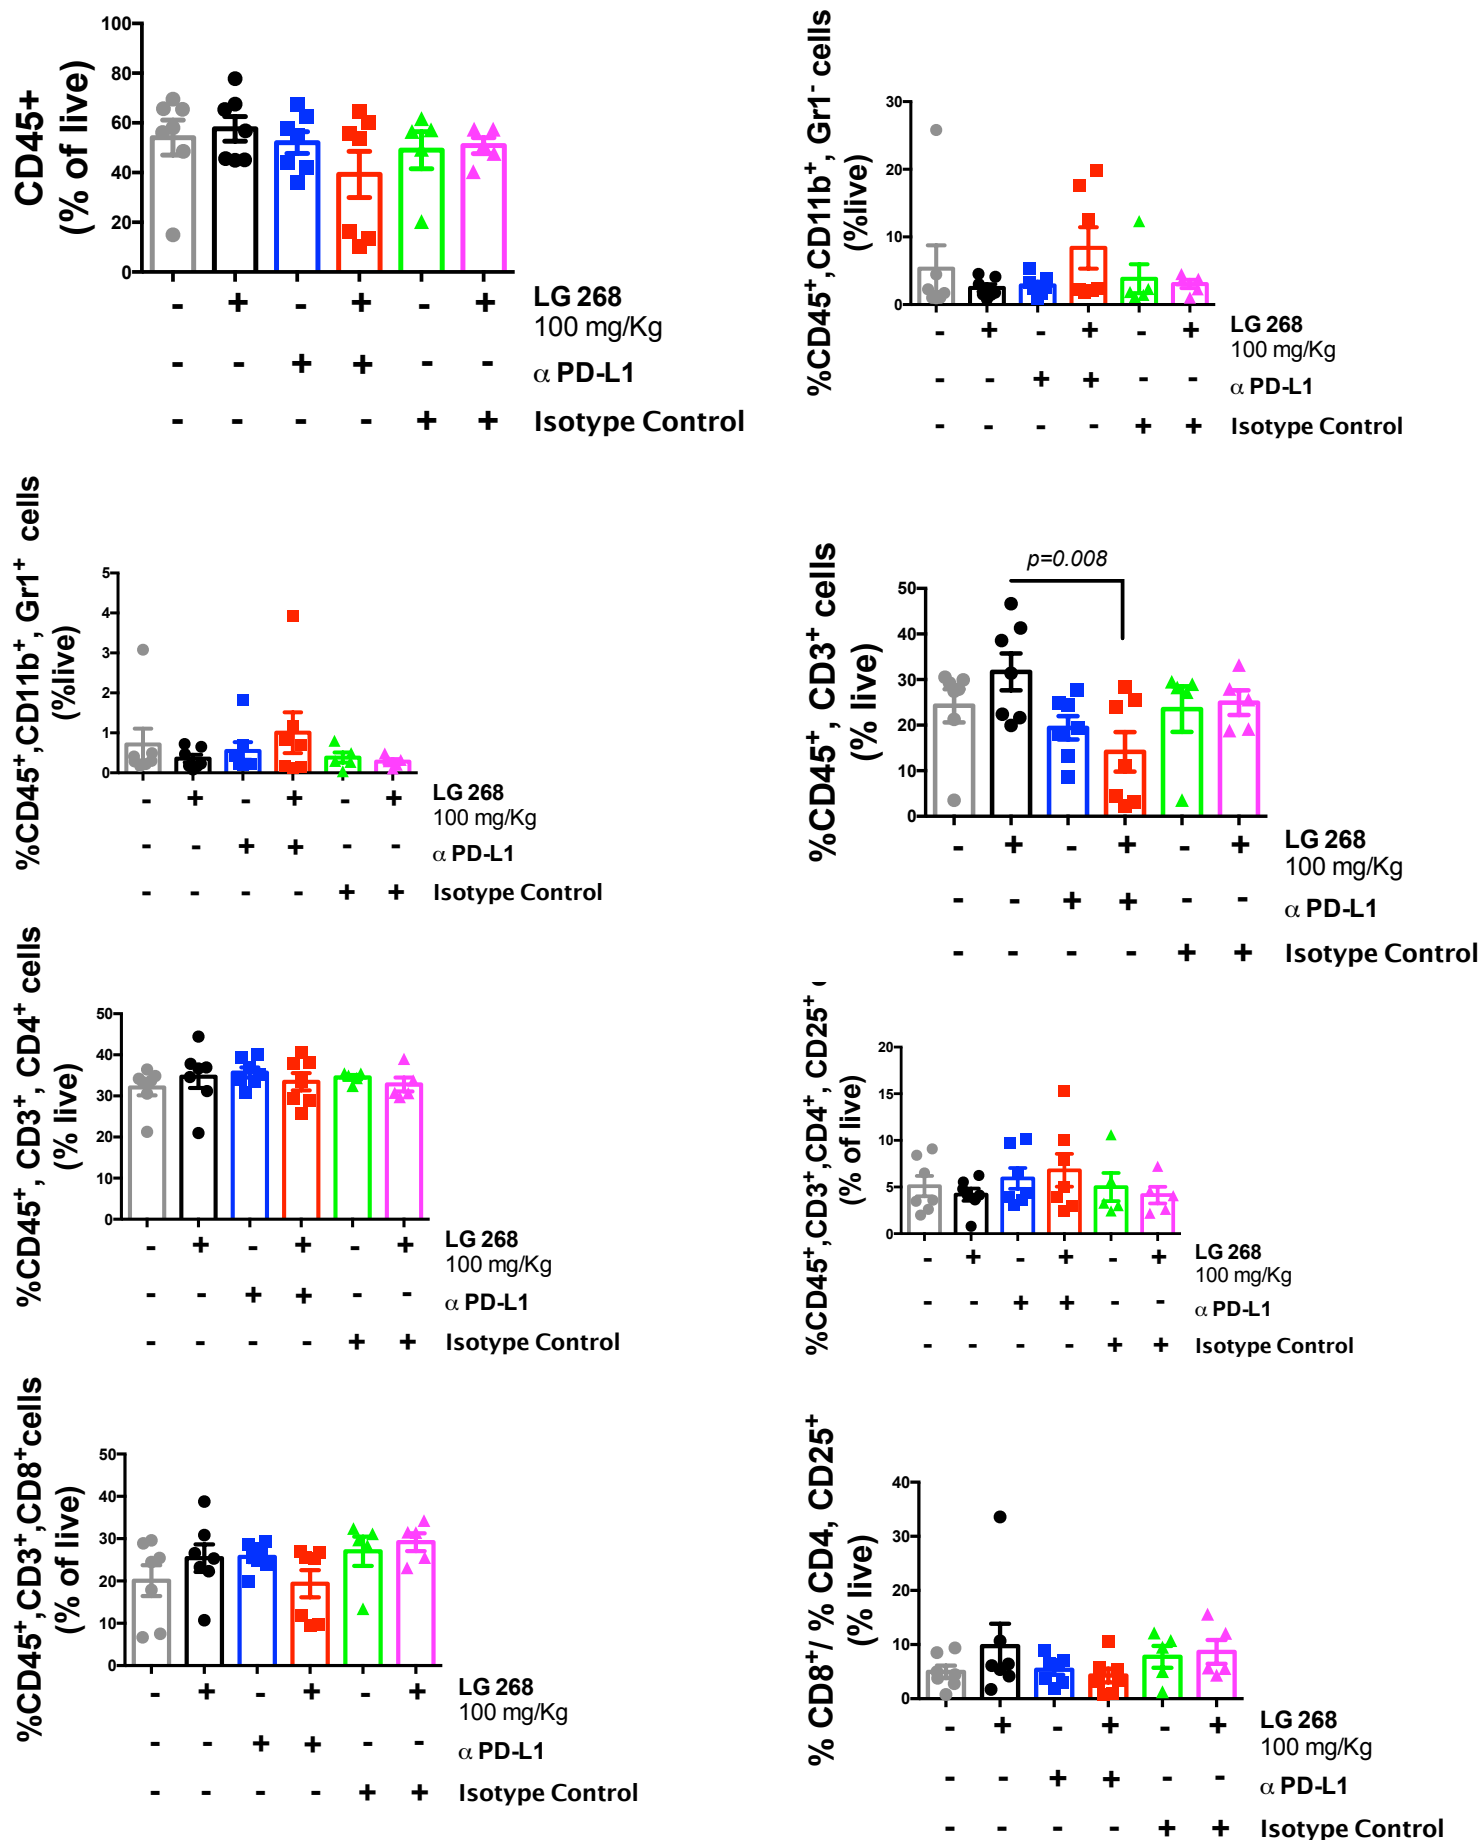

**Supplementary Figure 12.** Cell populations in intact mammary glands of PyMT mice treated for 15 days. Treatment followed the regimen shown in figure 9. n=5-7, Bars represent average and error bars the standard error of the mean (SEM).

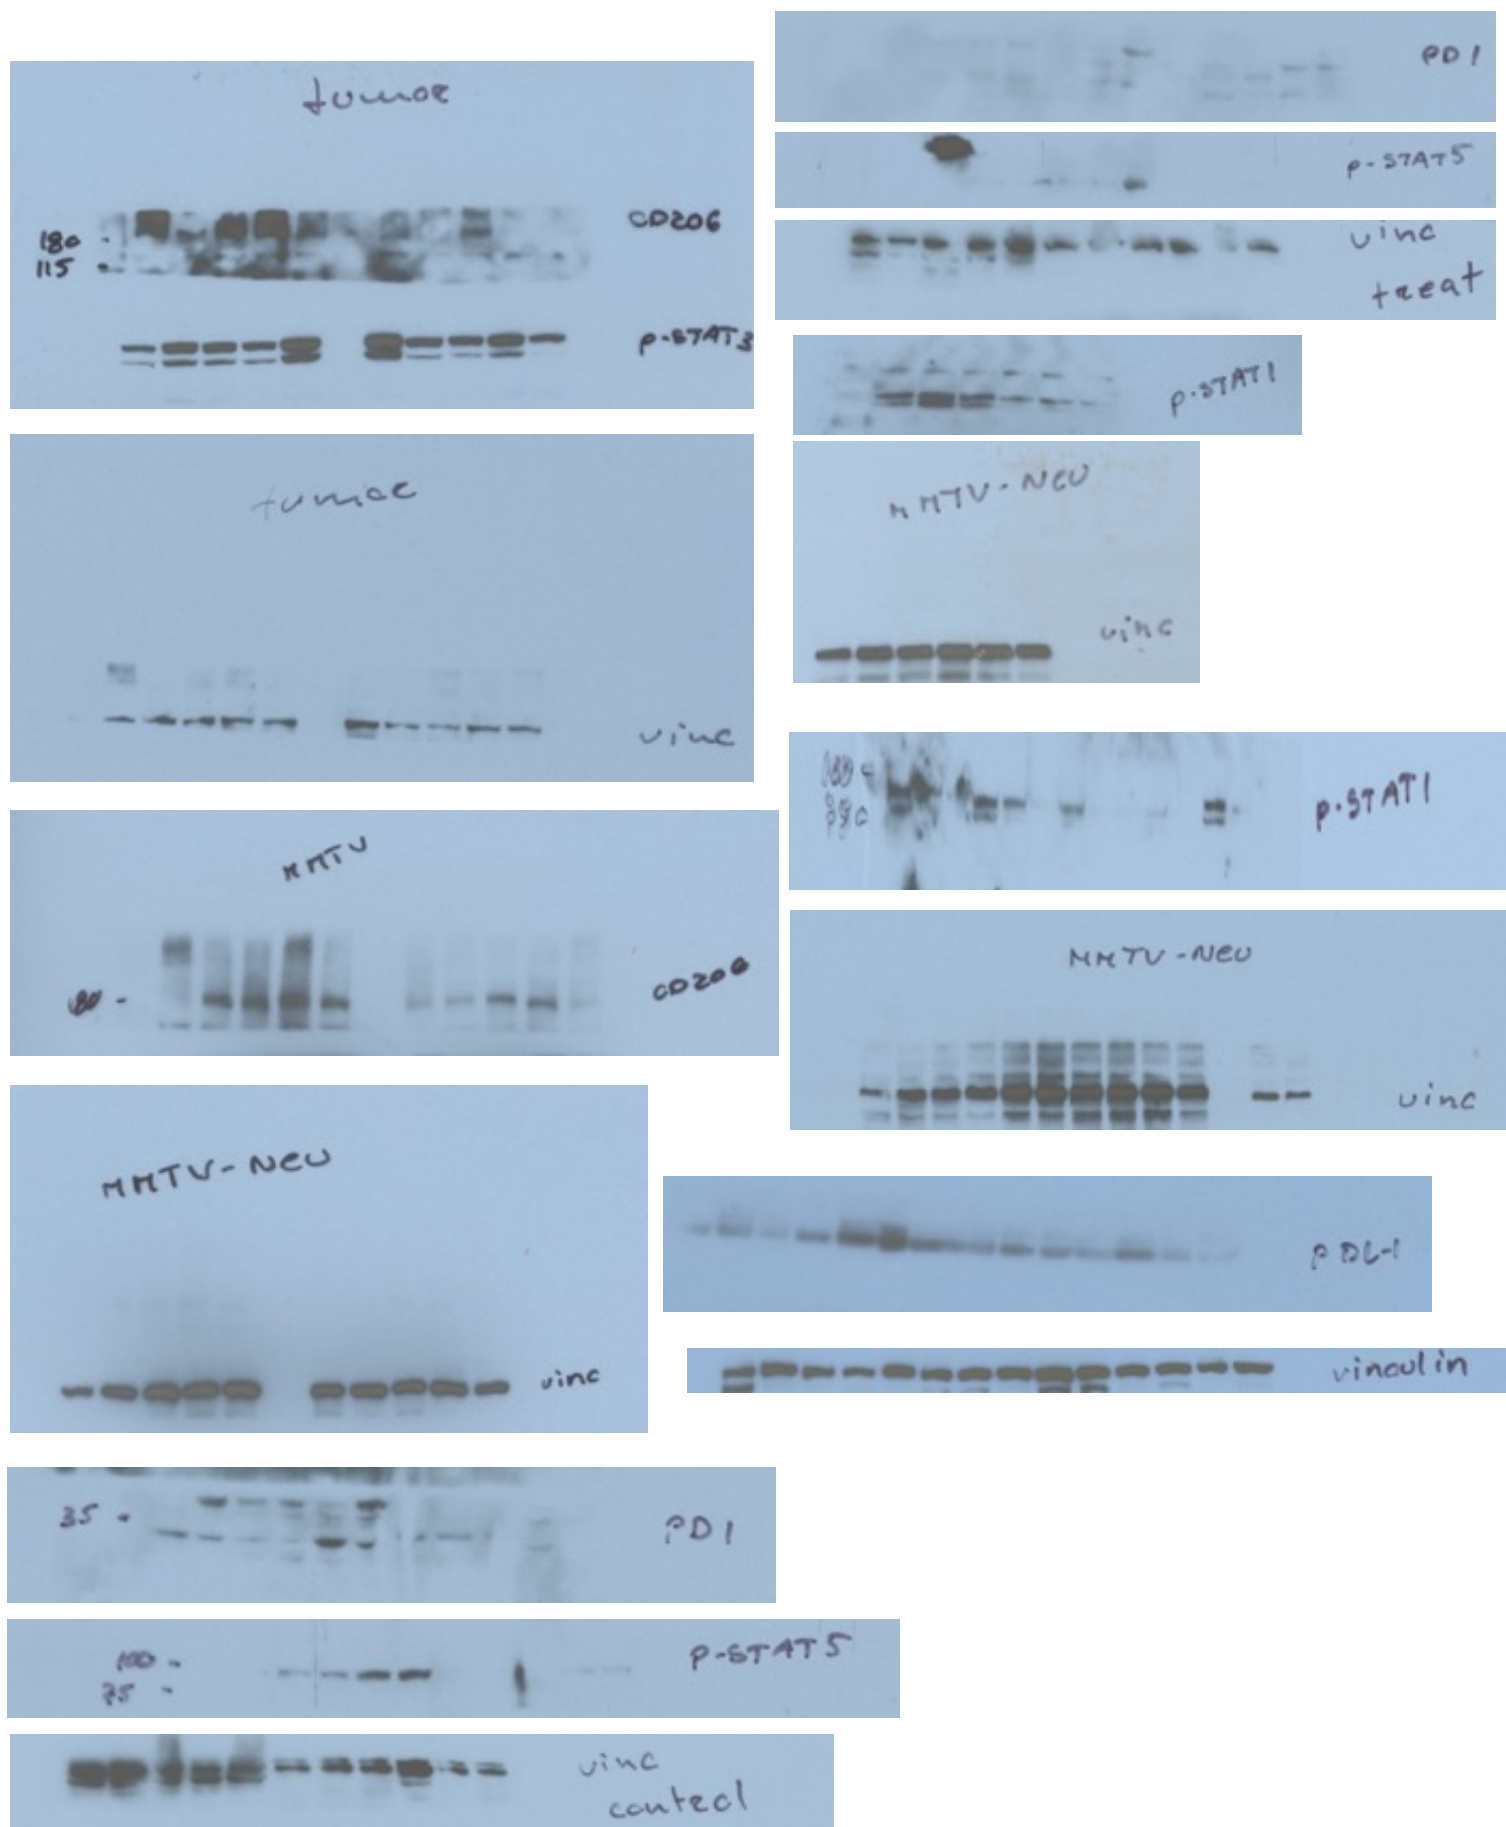

**Supplementary Figure 13.** Immunoblots used for the quantification of CD206, PD-L1, PD-1, p-STAT1, p-STAT5 and p-STAT3 in tumors of MMTV-Neu mice treated with LG268 and respective controls.

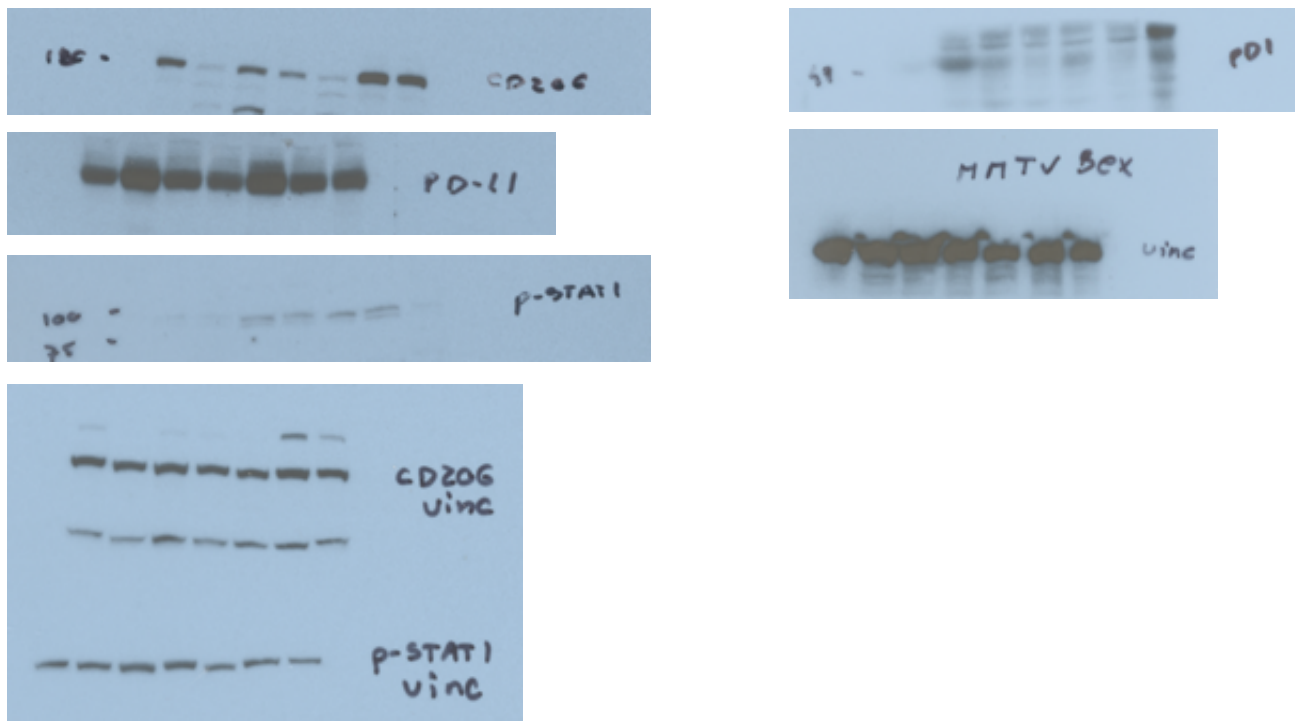

**Supplementary Figure 14.** Immunoblots used for the quantification of CD206, PD-L1, PD-1, p-STAT1, in tumors of MMTV-Neu mice treated with Bexarotene and respective controls.

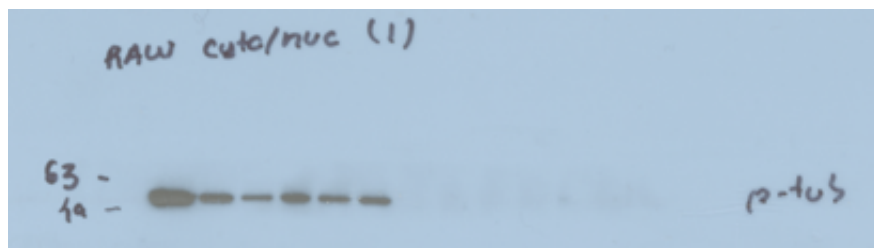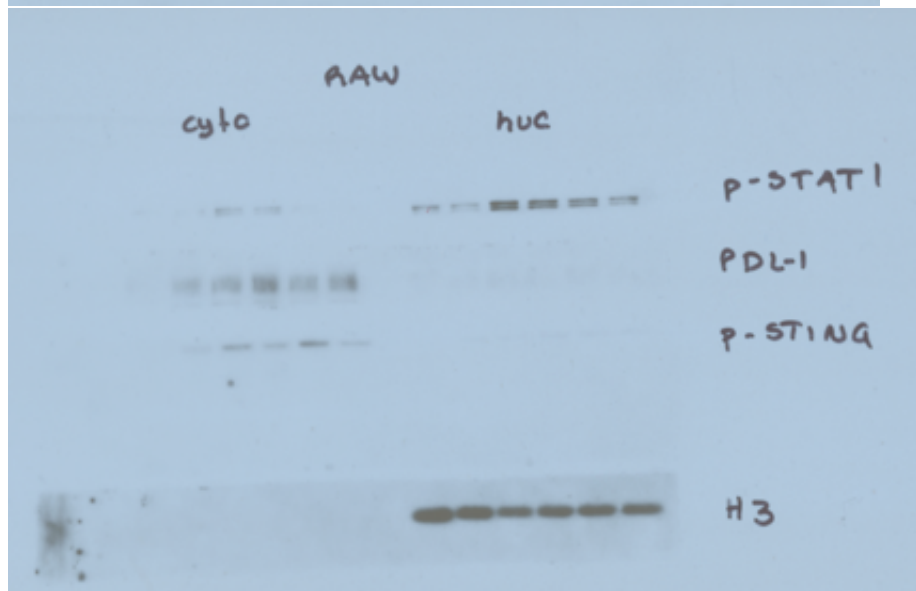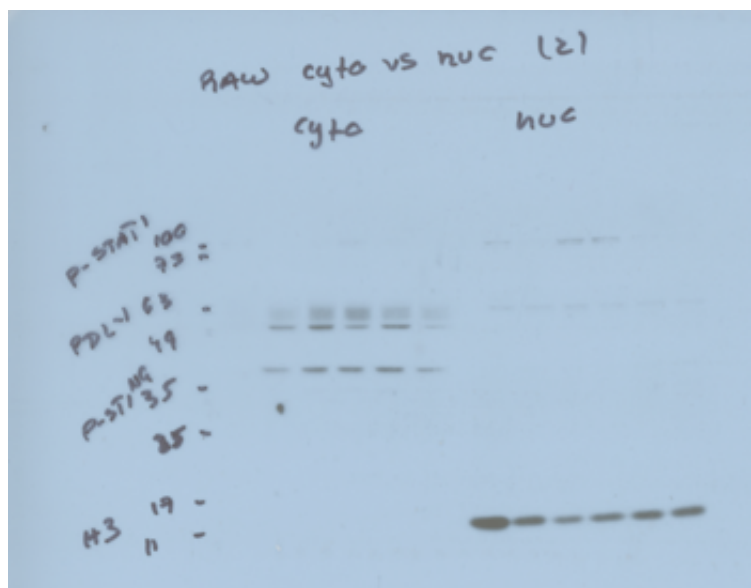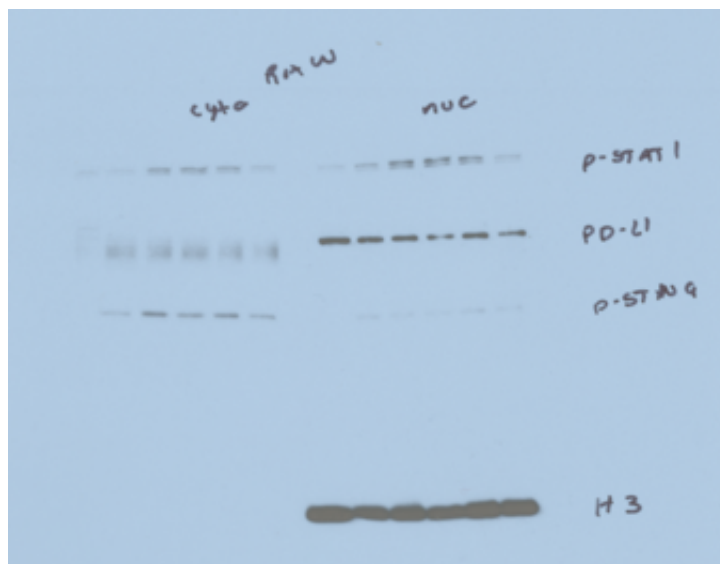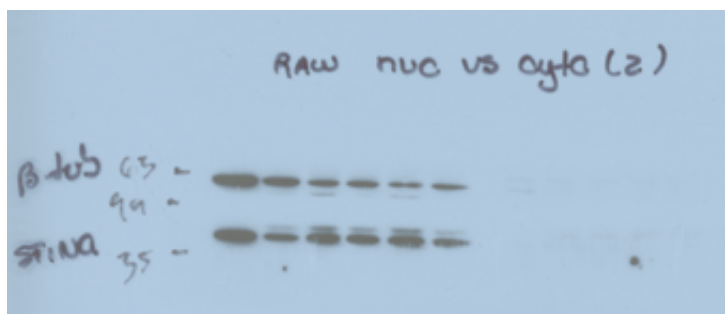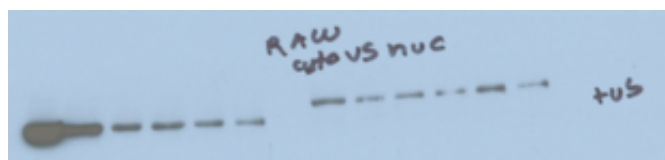

**Supplementary Figure 15.** Immunoblots of 3 independent experiments for figure 5E.

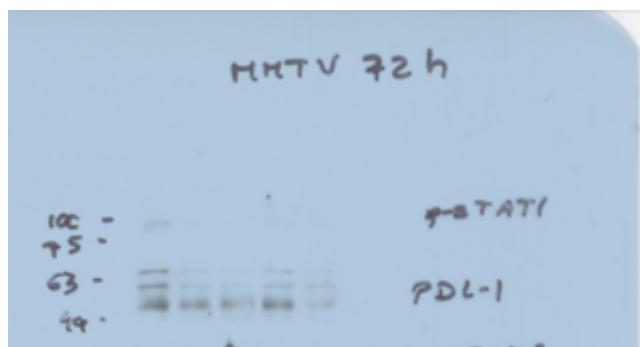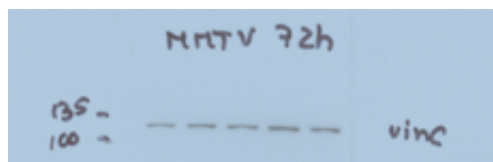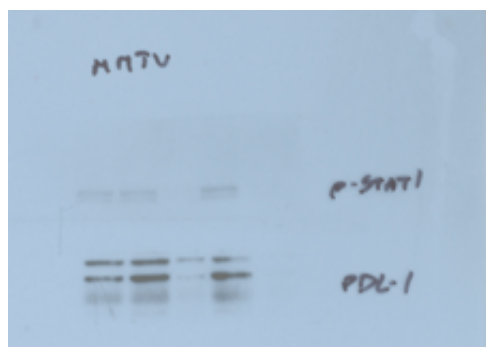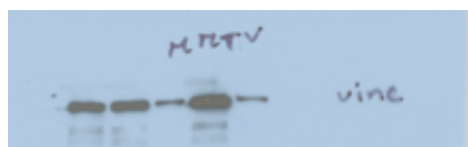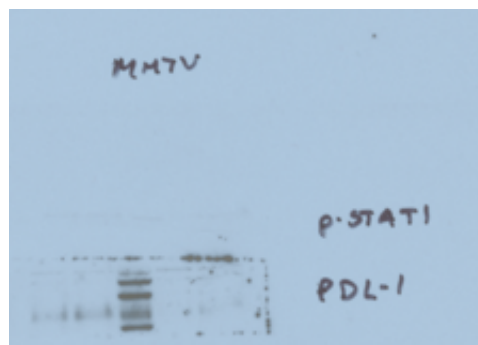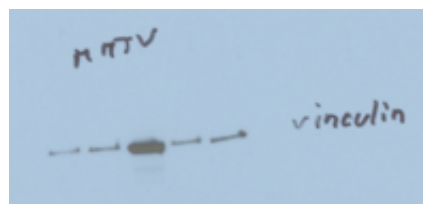

**Supplementary Figure 16.** Immunoblots of 3 independent experiments for figure 51.

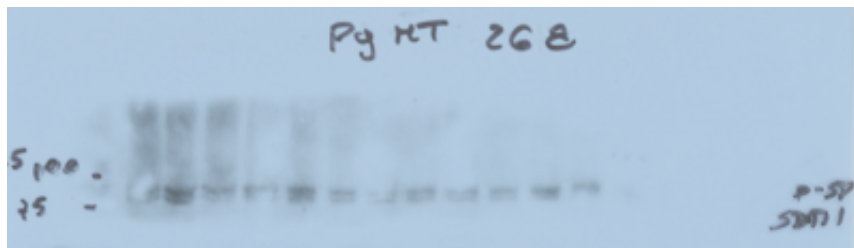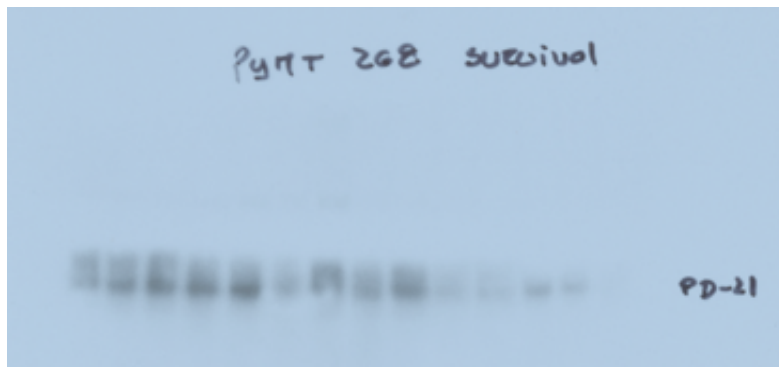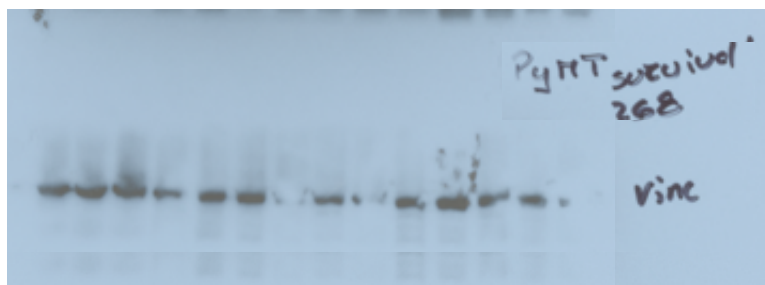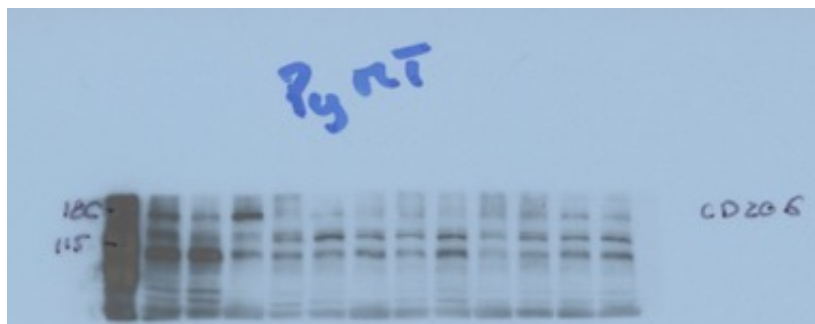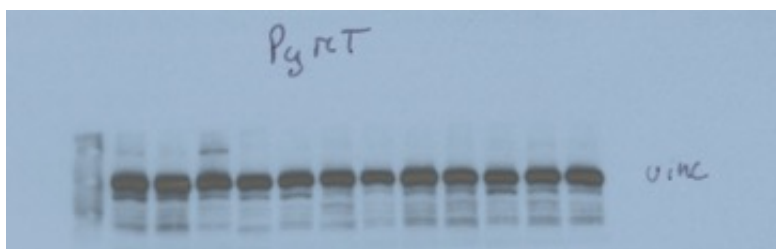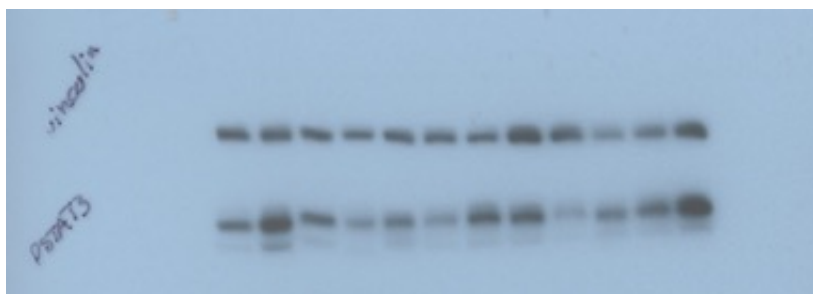

**Supplementary Figure 17.** Immunoblots used for the quantification of CD206, PD-L1, p-STAT1, and p-STAT3 in tumors of PyMT mice treated with LG268 and respective controls.

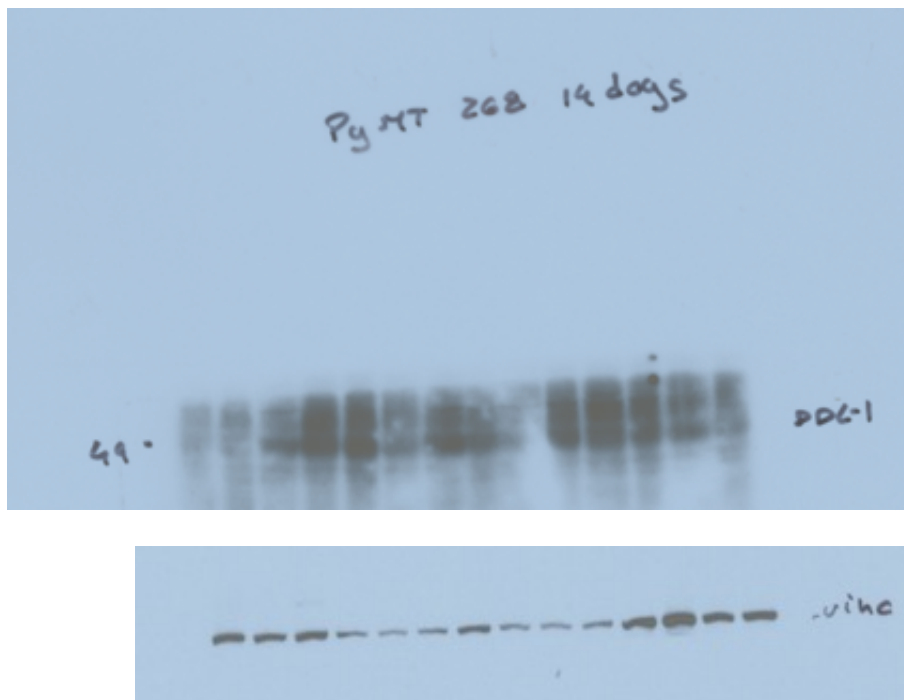

**Supplementary Figure 18.** Immunoblots used for the quantification of PD-L1 in tumors of PyMT mice treated with LG268 for 14 days and respective controls.
